# Supplementary material for: LIS1-dependent retrograde translocation of excitatory synapses in developing interneuron dendrites
Source: PubMed Central journal article supplement — Nat Commun. 2012 Mar 6;3:722–. doi: 10.1038/ncomms1736 (PMC3316883; doi:10.1038/ncomms1736), 2012-03-06
Supplement: ncomms1736-s1.pdf [file ncomms1736-s1.pdf]

## Supplementary Information

### Supplementary Figures

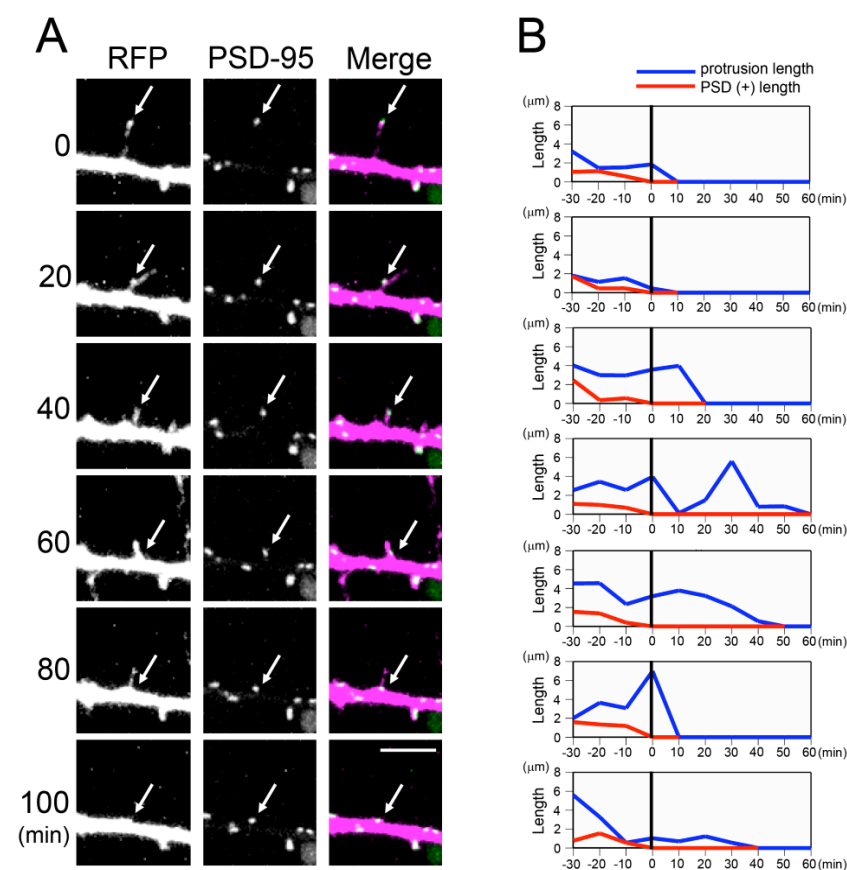

**Supplementary Figure S1** Retraction of dendritic protrusions after transfer of PSD-95-GFP puncta to the parental dendritic shaft. **(a)** Time-lapse imaging of PSD-95-GFP and RFP in dissociated hippocampal neurons at 9 DIV. Retrograde translocation of PSD-95-GFP puncta toward the dendritic shaft (arrows) and subsequent absorption of the protrusion are visualized. Bar, 5  $\mu\text{m}$ . **(b)** Lengths of dendritic protrusions and lengths between PSD-95-GFP puncta and the base of the protrusions were plotted for 7 independent image sequences. Retrograde movement of PSDs and shrinkage of protrusions are correlated.

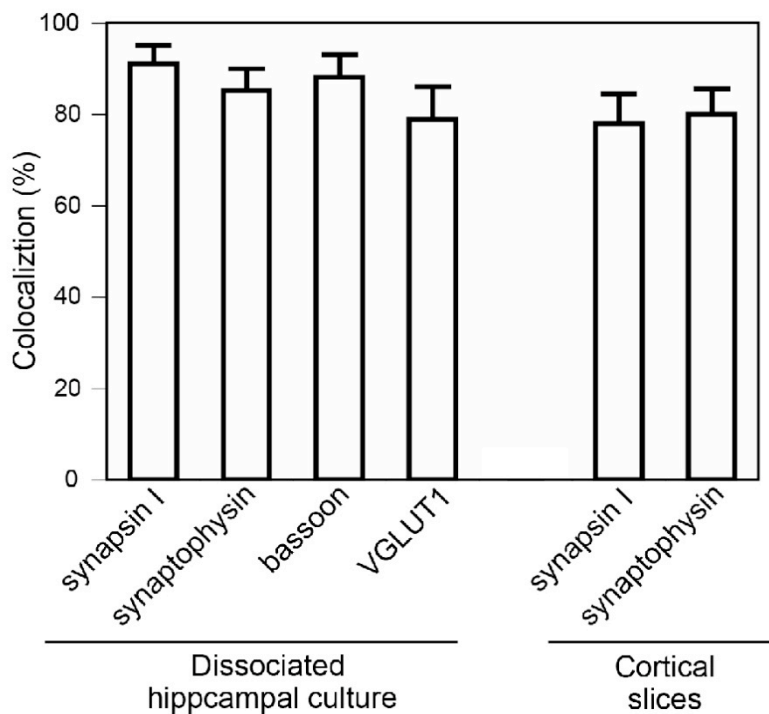

**Supplementary Figure S2** Colocalization of PSD-95-GFP puncta and presynaptic markers at the dendritic protrusions. In dissociated cultures, 85-91% of PSD-95-GFP puncta were associated with presynaptic structures immunopositive for either synapsin I ( $91.0 \pm 4.1\%$ ), synaptophysin ( $85.2 \pm 4.8\%$ ), or bassoon ( $88.2 \pm 5.0\%$ ) ( $n = 15$  cells for each condition). Colocalization with vGLUT1 tended to be lower than other presynaptic markers ( $79.0 \pm 7.2\%$ ), possibly due to the presence of presynaptic boutons expressing vGLUT2. In cortical slices, 78-80% of PSD-95-GFP clusters in dendritic protrusions were associated with puncta positive with either synapsin I ( $78.1 \pm 6.5\%$ ) or synaptophysin ( $80.1 \pm 5.6\%$ ) (11 cells for each condition). All data are mean  $\pm$  SEM.

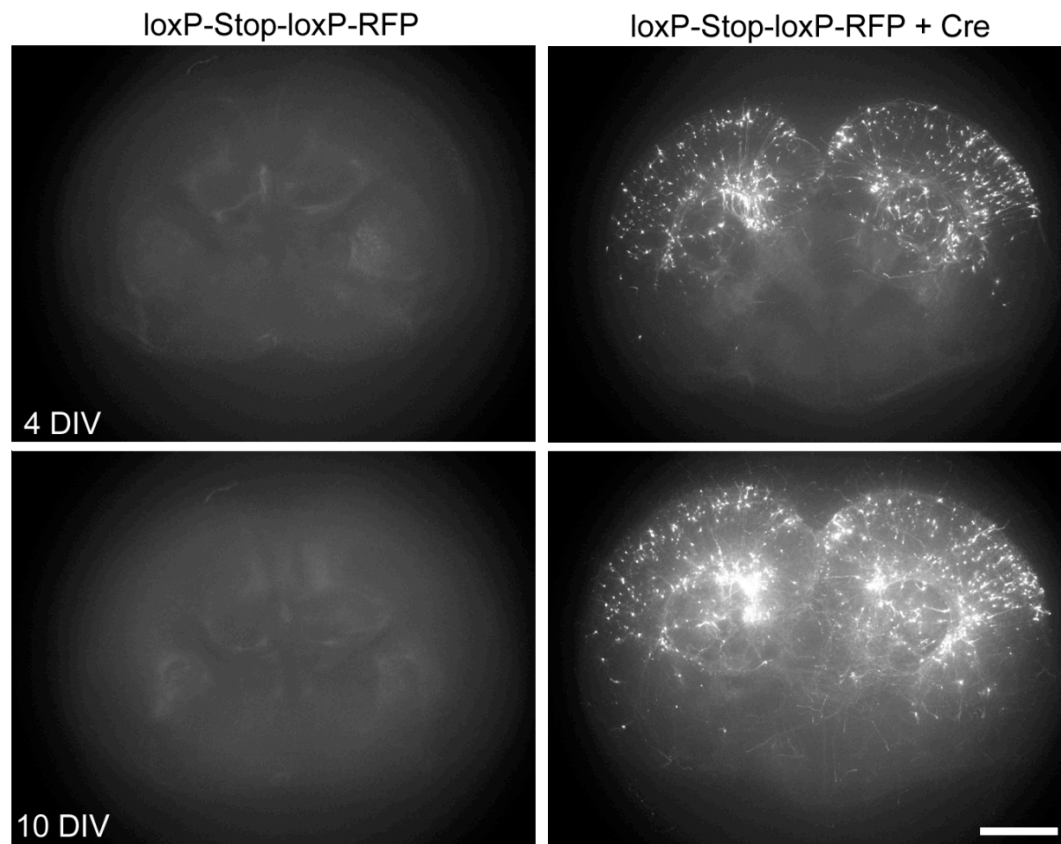

**Supplementary Figure S3** Specificity of a Cre indicator plasmid. To confirm specific expression of RFP from the Cre indicator plasmid (loxP-Stop-loxP-RFP) in the presence of Cre recombinase activity, cortical slices were transfected with either loxP-Stop-loxP-RFP plasmid alone or loxP-Stop-loxP-RFP plasmid plus Cre expression plasmid. RFP fluorescence was detected only in the latter condition, indicating specificity of this indicator plasmid. Scale bar = 1 mm.
